# Supplementary material for: Diboron complexes with bis-spiro structures as high-performance blue emitters for OLEDs
Source: Royal Society of Chemistry journal article supplement (doi:10.1039/c5dt02093j), 2015-01-01
Supplement: c5dt02093j1.pdf [file c5dt02093j1.pdf]

## SUPPORTING INFORMATION

# Diboron complexes with bis-spiro structures as high-performance blue emitters for OLEDs

Zhenyu Zhang, Zuolun Zhang,\* Kaiqi Ye, Jingying Zhang, Hongyu Zhang and Yue Wang

State Key Laboratory of Supramolecular Structure and Materials, International Joint Research Laboratory of Nano-Micro Architecture Chemistry, College of Chemistry, Jilin University, Changchun 130012, P. R. China  
E-mail: zuolunzhang@jlu.edu.cn

### *Contents*

|                                                                                     |       |
|-------------------------------------------------------------------------------------|-------|
| Single-crystal X-ray diffraction                                                    | S2–S3 |
| Molecular orbital distributions and energy levels                                   | S4    |
| DSC curves of <b>1</b> and <b>2</b>                                                 | S5    |
| Time-of-flight transients for hole and electron mobilities of <b>1</b> and <b>2</b> | S5    |
| EL spectra of <b>D1</b> and <b>D2</b> at different driving voltages                 | S6    |
| Cyclic voltammetric data of <b>1</b> and <b>2</b>                                   | S7    |

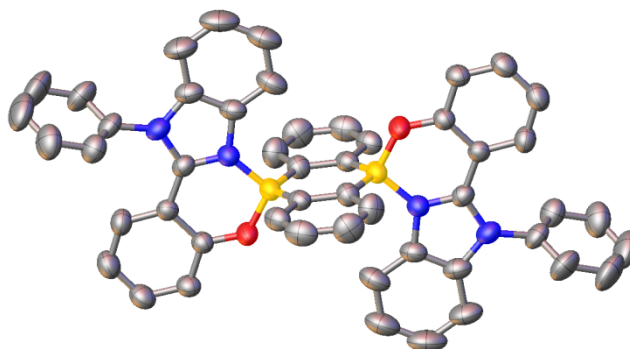

**Fig. S1** Molecular structure of **1** as determined by single crystal X-ray diffraction. Atom color code: carbon (gray), boron (yellow), nitrogen (blue), oxygen (red). Hydrogen atoms are omitted for clarity. Atomic displacement ellipsoids are drawn at 50% probability.

**Crystal Data.**  $C_{50}H_{34}B_2N_4O_2$ ,  $M = 744.43$ , monoclinic,  $C2/c$ ,  $a = 23.440(5)$  Å,  $b = 9.4816(19)$  Å,  $c = 18.355(4)$  Å,  $\alpha = 90^\circ$ ,  $\beta = 110.48(3)^\circ$ ,  $\gamma = 90^\circ$ ,  $V = 3821.6(13)$  Å<sup>3</sup>,  $T = 293(2)$  K,  $Z = 4$ ,  $\mu$  (Mo  $K\alpha$ ) =  $0.079$  mm<sup>-1</sup>, 17271 reflections measured, 4341 unique. The final  $wR_2$  was 0.1445 (all data) and  $R_1$  was 0.0532 ( $I \geq 2\sigma(I)$ ).

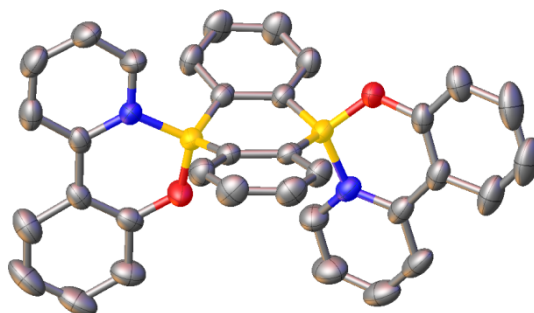

**Fig. S2** Molecular structure of **2** as determined by single crystal X-ray diffraction. Atom color code: carbon (gray), boron (yellow), nitrogen (blue), oxygen (red). Hydrogen atoms are omitted for clarity. Atomic displacement ellipsoids are drawn at 50% probability.

**Crystal Data.**  $C_{34}H_{24}B_2N_2O_2$ ,  $M = 514.17$ , monoclinic,  $P2(1)/c$ ,  $a = 11.169(2)$  Å,  $b = 16.752(3)$  Å,  $c = 14.317(3)$  Å,  $\alpha = 90^\circ$ ,  $\beta = 106.57(3)^\circ$ ,  $\gamma = 90^\circ$ ,  $V = 2567.5(9)$  Å<sup>3</sup>,  $T = 293(2)$  K,  $Z = 4$ ,  $\mu$  (Mo  $K\alpha$ ) =  $0.082$  mm<sup>-1</sup>, 24493 reflections measured, 5844 unique. The final  $wR_2$  was 0.1157 (all data) and  $R_1$  was 0.0583 ( $I \geq 2\sigma(I)$ ).

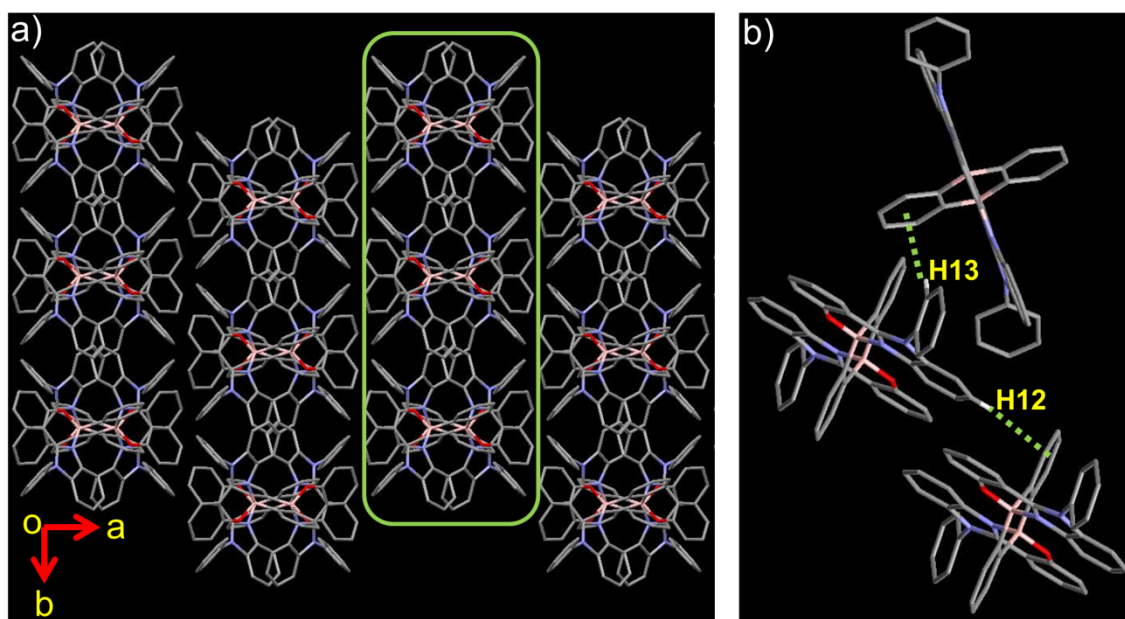

**Fig. S3** a) Two dimensional layer structures formed along crystallographic *c*-axis in the crystal of **1**; b) C-H... $\pi$  interactions (green line) in the layer structures.

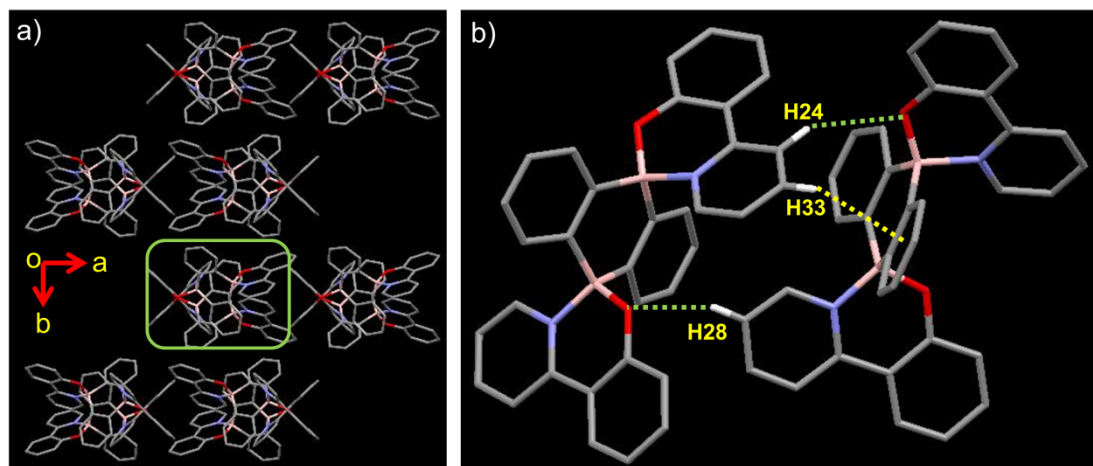

**Fig. S4** a) Molecular chains formed along crystallographic *c*-axis in the crystal of **2**; b) C-H...O hydrogen-bonding (green line) and C-H... $\pi$  (yellow line) interactions in the molecular chains.

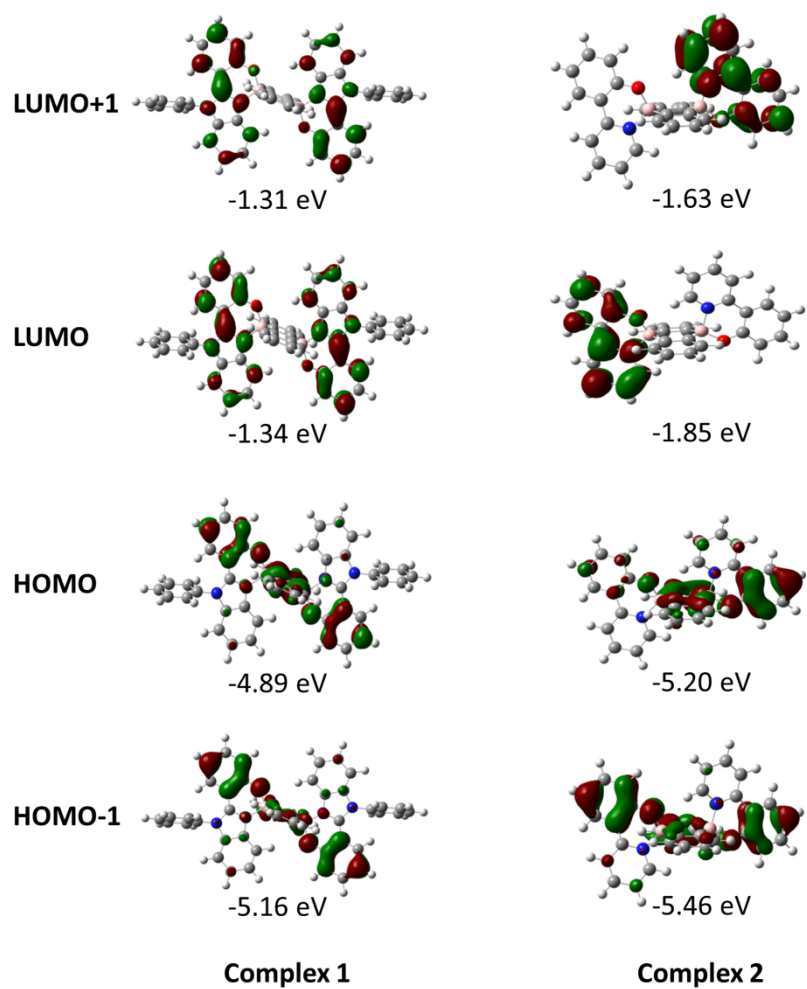

**Fig. S5** DFT-calculated molecular orbital distributions and energy levels of **1** and **2**.

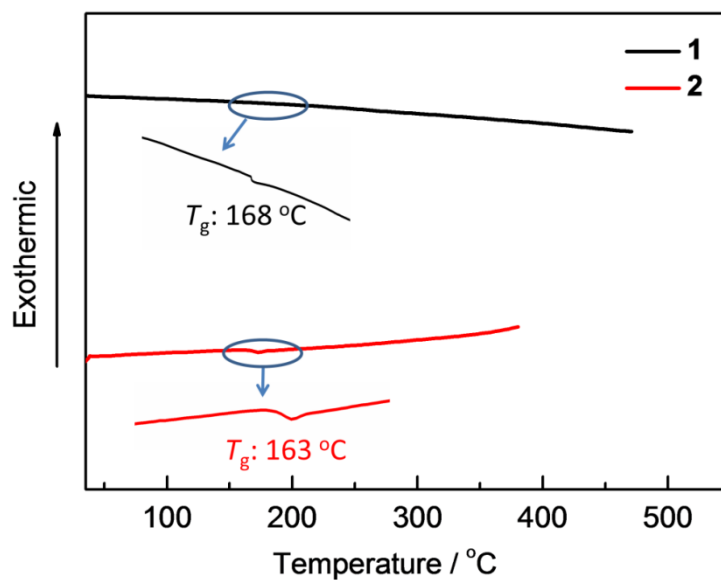

**Fig. S6** DSC curves of **1** and **2** (the second heating cycle).

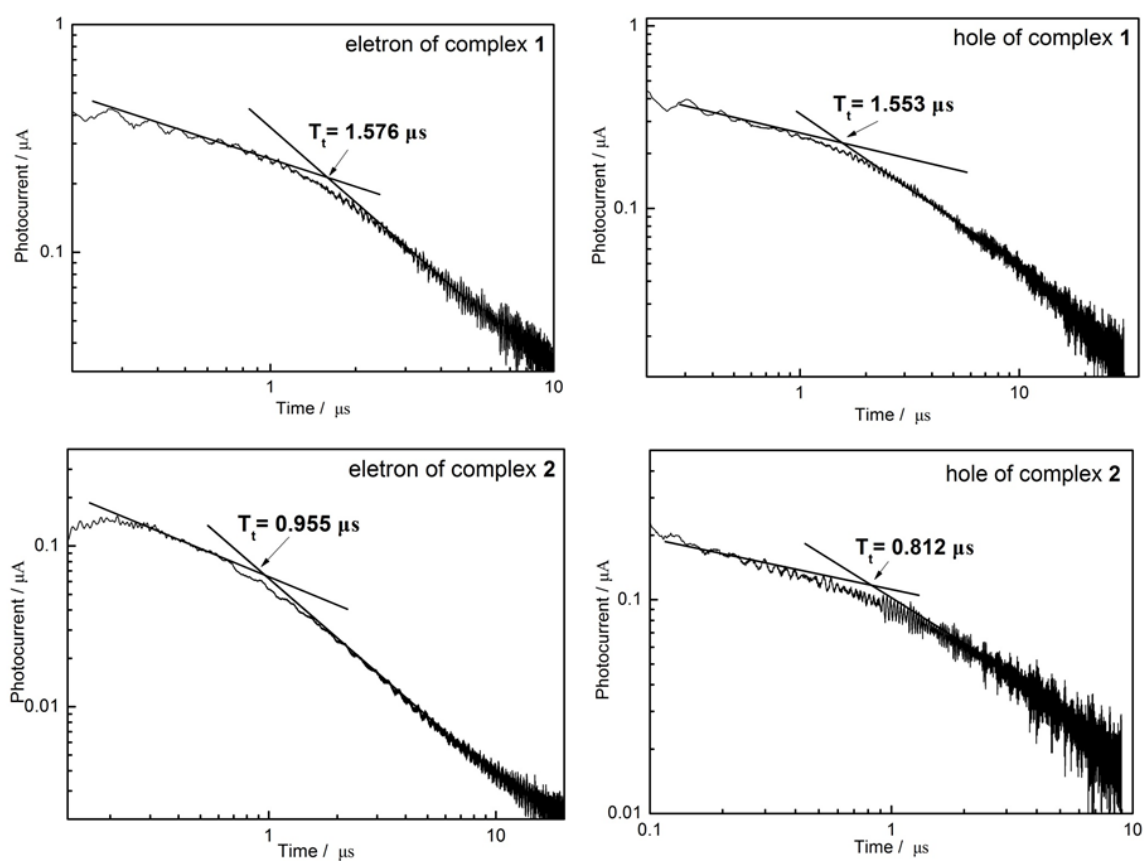

**Fig. S7** Time-of-flight transients for hole and electron mobilities of **1** and **2**. The carrier mobilities were estimated based on the equation of  $\mu = D/ET_t$ , where  $D$  is the thickness of the transporting layer (for **1**,  $D = 1.1 \mu\text{m}$ ; for **2**,  $D = 1.2 \mu\text{m}$ ),  $E$  is the strength of electrical field ( $6.25 \times 10^5 \text{ V cm}^{-1}$ ), and  $T_t$  is the transit time.

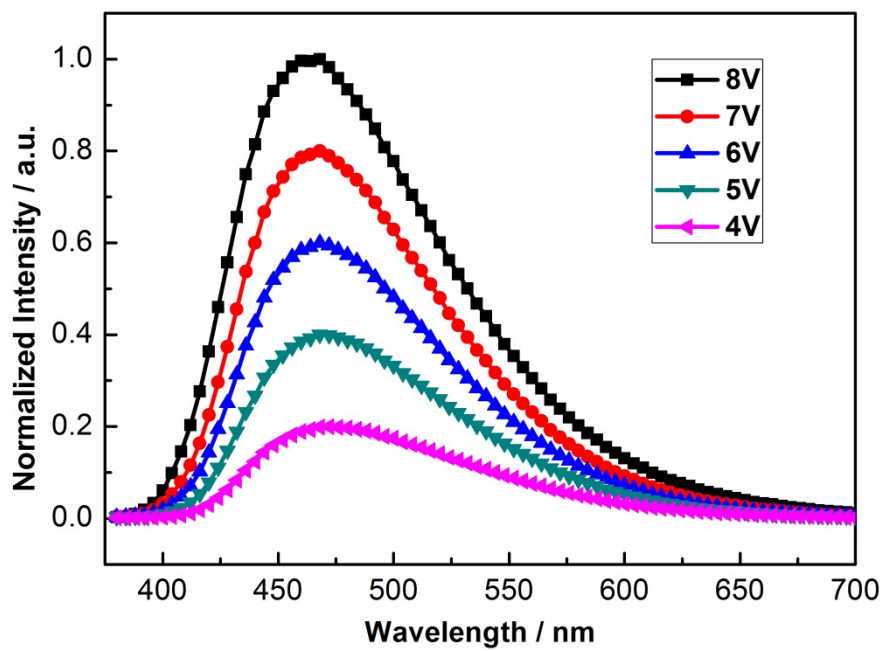

**Fig. S8** EL spectra of **D1** at different driving voltages.

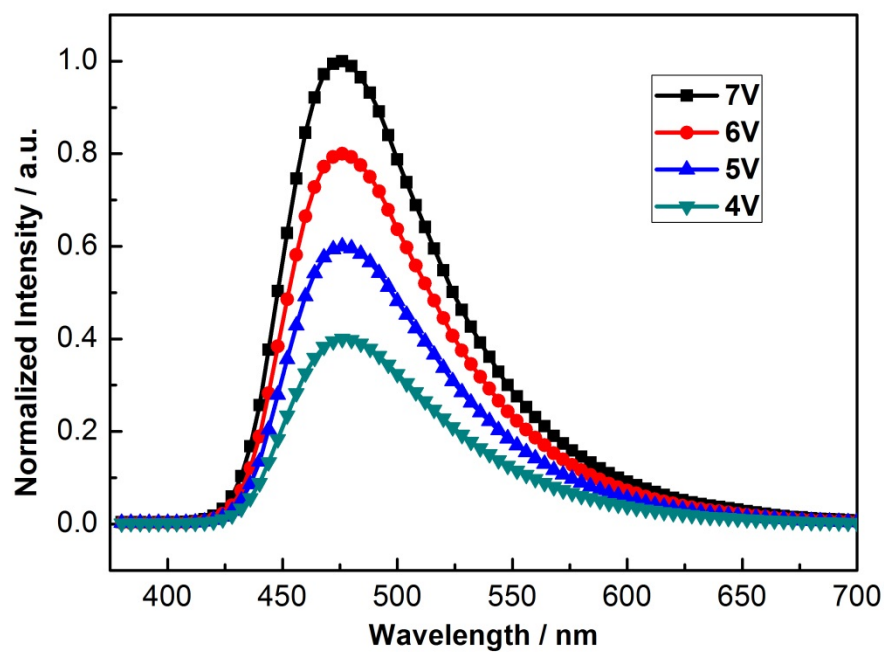

**Fig. S9** EL spectra of **D2** at different driving voltages.

**Table S1.** Cyclic voltammetric data measured in dichloromethane,<sup>a</sup> and related experimental and DFT-calculated (B3LYP/6-31G(d,p)) HOMO and LUMO energies.

|          | $E_{\text{ox}}^{\text{onset}}$<br>/ V | $E_{\text{red}}^{\text{onset}}$<br>/ V | Electrochemical <sup>b</sup> |              | DFT          |              |
|----------|---------------------------------------|----------------------------------------|------------------------------|--------------|--------------|--------------|
|          |                                       |                                        | HOMO<br>/ eV                 | LUMO<br>/ eV | HOMO<br>/ eV | LUMO<br>/ eV |
| <b>1</b> | +0.81                                 | −2.04                                  | −5.61                        | −2.76        | −4.89        | −1.34        |
| <b>2</b> | +0.87                                 | −1.99                                  | −5.67                        | −2.81        | −5.20        | −1.85        |

<sup>a</sup> Potentials are given vs. ferrocene/ferrocenium (Fc/Fc<sup>+</sup>). <sup>b</sup> Estimated assuming that the HOMO of Fc lies 4.8 eV below the vacuum level.
